# Supplementary material for: Embedded-AMP: A Multi-Thread Computational Method for the Systematic Identification of Antimicrobial Peptides Embedded in Proteome Sequences
Source: MDPI journal article supplement (doi:10.3390/antibiotics12010139), 2023-01-10
Supplement: s1 [file s1]

**Table S1.** Embedded AMP found in GAPDH in *Saccharomyces cerevisiae*

| Experimental AMP | Protein ID             | Predicted    |
|------------------|------------------------|--------------|
| VSWYDNEYGYSTR    | G3P2_YEAST             | Concatenated |
| ISWYDNEYGYSAR    | G3P1_YEAST             | No           |
| VSWYDNEYGYSTRV   | G3P2_YEAST             | Concatenated |
| ISWYDNEYGYSARV   | G3P1_YEAST             | No           |
| VSWYDNEYGYSTRVV  | G3P2_YEAST             | Concatenated |
| FRVPTVDVSVVD     | G3P2_YEAST, G3P1_YEAST | Concatenated |
| FRVPTVDVSVVDL    | G3P2_YEAST, G3P1_YEAST | Concatenated |
| ISWYDNEYGYSAR    | G3P1_YEAST             | No           |
| VSWYDNEYGYSTR    | G3P2_YEAST             | Concatenated |
| VSWYDNEYGYSTRV   | G3P2_YEAST             | Concatenated |
| LVSWYDNEYGYSTR   | G3P2_YEAST             | Concatenated |
| ISWYDNEYGYSARV   | G3P1_YEAST             | No           |
| ISWYDNEYGYSAR    | G3P1_YEAST             | No           |
| VSWYDNEYGYSTR    | G3P2_YEAST             | Concatenated |
| ISWYDNEYGYSARV   | G3P1_YEAST             | No           |
| VSWYDNEYGYSTRV   | G3P2_YEAST             | Concatenated |

Experimental ID column refers to the peptide sequence that was experimentally identified as AMP from the glyceraldehyde 3-phosphate dehydrogenase protein in yeast [9]. Protein ID refers to the Uniprot accession ID of the protein that embeds the AMP identified. Predicted corresponds with the prediction as AMP by our method; there are 2 different classes of predictions: No, this AMP was not predicted as AMP by our method; Concatenated, this peptide sequence was concatenated to other AMP that were overlapping with it and predicted as AMP.

**Table S2.** Embedded AMP found in the proteome of *Saccharomyces cerevisiae*

| Experimental AMP      | Protein ID | Predicted |
|-----------------------|------------|-----------|
| PVGDQPPDIERQIK        | VPS1_YEAST | No        |
| PVGDQPPDIERQIKD       | VPS1_YEAST | No        |
| TEDPAKNFQPD TGRIE     | PYC1_YEAST | Embedded  |
| PVGDQPPDIERQIKDM      | VPS1_YEAST | No        |
| APPLPPSAPPPP          | VRP1_YEAST | No        |
| APPLPPTAPPPP          | VRP1_YEAST | No        |
| LPPPPPPSVATSVP        | VRP1_YEAST | No        |
| GAPAPPPPPPPPALGGSAPKP | VRP1_YEAST | Exact     |
| TRPGDLPEKDF           | WTM1_YEAST | No        |
| IIDNAGKPGEILRT        | WTM1_YEAST | Exact     |
| IAAIGADLIDERIIDQ      | EF3A_YEAST | Embedded  |
| IAAIGADLIDERIIDQQ     | EF3A_YEAST | Embedded  |

|                               |                       |          |
|-------------------------------|-----------------------|----------|
| <b>IVLDEPTNYLDRDSLGA</b>      | EF3A_YEAST/EF3B_YEAST | Embedded |
| <b>AEPISSSENGVLEPR</b>        | YG3A_YEAST            | No       |
| <b>GGFGGPGGPGGQGFGGRQGPGG</b> | YNU8_YEAST            | Exact    |
| <b>KEGDDAPESPDHIF</b>         | YRB1_YEAST            | No       |
| <b>LEETKESLQNKGGQEVKEQ</b>    | ZEO1_YEAST            | No       |

Experimental ID column refers to the peptide sequence that was experimentally identified as AMP [30]. Protein ID refers to the Uniprot accession ID of the protein that embeds the AMP identified. Predicted corresponds with the prediction as AMP by our method; there are 3 different classes of predictions: No, this AMP was not predicted as AMP by our method; Concatenated, this peptide sequence was concatenated to other AMP that were overlapping with it and predicted as AMP; Embedded, this peptide sequence was found as part of another larger AMP identified by our method.

**Table S3.** Peptides molecular descriptors

| Index    | Molecular descriptor name                 | Index     |                                             |
|----------|-------------------------------------------|-----------|---------------------------------------------|
| <b>1</b> | Sequence length                           | <b>27</b> | Average hydrophobicity TOSSI2002 [50]       |
| <b>2</b> | Phenylalanine composition                 | <b>28</b> | Distribution of "EALMQKRH" at 50% [51,52]   |
| <b>3</b> | Net charge at pH 9.0                      | <b>29</b> | Distribution of "EALMQKRH" at 100% [51, 52] |
| <b>4</b> | Distribution of "MHKFRYW" at 50% [51, 52] | <b>30</b> | Distribution of "CLVIM" [53]                |
| <b>5</b> | Methionine composition [54]               | <b>31</b> | Distribution of "DE" at 0% [51, 52]         |
| <b>6</b> | Distribution of "NVEQIL" at 75% [51, 52]  | <b>32</b> | Distribution of "FWY" [53]                  |
| <b>7</b> | Glutamine composition [54]                | <b>33</b> | Distribution of "KR" at 100% [51, 52]       |

| Index     | Molecular descriptor name                 | Index     |                                                |
|-----------|-------------------------------------------|-----------|------------------------------------------------|
| <b>8</b>  | Hydrophobic moment [55]                   | <b>34</b> | Distribution of "MHKFRYW" [51, 52]             |
| <b>9</b>  | Distribution of "PATGS" at 0% [51, 52]    | <b>35</b> | Distribution of "ALFCGIVW" at 0% [51, 52]      |
| <b>10</b> | Distribution of "LIFWCMVY" at 0% [51, 52] | <b>36</b> | Distribution of "MPSTHY" at 0% [51, 52]        |
| <b>11</b> | Average sequence composition [56]         | <b>37</b> | Distribution of "RKQEND" at 0% [51, 52]        |
| <b>12</b> | Distribution of "HQRKNED" at 25% [51, 52] | <b>38</b> | Distribution of "RKQEND" at 25% [51, 52]       |
| <b>13</b> | Net charge [57]                           | <b>39</b> | Distribution of "KMHFRYW" [51, 52]             |
| <b>14</b> | Average hydrophilicity [58]               | <b>40</b> | Distribution of "DE" [51, 52]                  |
| <b>15</b> | Average hydrophobicity CIDH920102 [59]    | <b>41</b> | Distribution of "KR" [51, 52]                  |
| <b>16</b> | Average hydrophobicity CIDH920104 [59]    | <b>42</b> | Distribution of "VIYCWFT" at 50% [51, 52]      |
| <b>17</b> | Average hydrophobicity CIDH920105 [59]    | <b>43</b> | Distribution of "ALFCGIVW" [51, 52]            |
| <b>18</b> | Average hydrophobicity MANP780101 [60]    | <b>44</b> | Transition from "CLVIMFW" to "RKEDQN" [51, 52] |

| Index | Molecular descriptor name                | Index |                                                                            |
|-------|------------------------------------------|-------|----------------------------------------------------------------------------|
| 19    | Average hydrophobicity PONP800105 [61]   | 45    | Composition of tripeptide composed by [RKEDQN][GASTPHY][CLVIMFW] [51, 52]  |
| 20    | Distribution of “GASDT” at 75% [51, 52]  | 46    | Composition of tripeptide composed by [CLVIMFW][CLVIMFW][GASTPHY] [51, 52] |
| 21    | Average hydrophobicity PRAM900101 [62]   | 47    | Transition from “ALFCGIVW” to “RKEDQN” [51, 52]                            |
| 22    | Average hydrophobicity SWER830101 [63]   | 48    | Distribution of “GASPHY” at 0% [51, 52]                                    |
| 23    | Distribution of “GASDT” at 100% [51, 52] | 49    | Distribution of “CLVIMFW” at 0% [51, 52]                                   |
| 24    | Average hydrophobicity ZIMJ680101 [64]   | 50    | Composition of tripeptide composed by [CLVIMFW][CLVIMFW][CLVIMFW] [51, 52] |
| 25    | Average hydrophobicity WOLR790101 [65]   | 51    | Distribution of “GASPHY” at 75% [51, 52]                                   |
| 26    | Average hydrophobicity CASG920101 [66]   |       |                                                                            |

## References

- [9] P. Branco *et al.*, “Identification of novel GAPDH-derived antimicrobial peptides secreted by *Saccharomyces cerevisiae* and involved in wine microbial interactions.,” *Applied microbiology and biotechnology*, vol. 98, no. 2, pp. 843–53, Jan. 2014, doi: 10.1007/s00253-013-5411-y.
- [30] M. F. da S. Santos, C. S. Freitas, G. C. Verissimo da Costa, P. R. Pereira, and V. M. F. Paschoalin, “Identification of Antibacterial Peptide Candidates Encrypted in Stress-Related and Metabolic

- Saccharomyces cerevisiae Proteins,” *Pharmaceuticals (Basel)*, vol. 15, no. 2, p. 163, Jan. 2022, doi: 10.3390/ph15020163.
- [50] A. Tossi, L. Sandri, and A. Giangaspero, “New consensus hydrophobicity scale extended to non-proteinogenic amino acids - Technische Informationsbibliothek (TIB),” in *European peptide symposium*, pp. 416–417. Accessed: Dec. 12, 2022. [Online]. Available: <https://www.tib.eu/en/search/id/BLCP%3ACN054397688/New-consensus-hydrophobicity-scale-extended-to/>
- [51] K. Tomii and M. Kanehisa, “Analysis of amino acid indices and mutation matrices for sequence comparison and structure prediction of proteins,” *Protein Eng*, vol. 9, no. 1, pp. 27–36, Jan. 1996, doi: 10.1093/protein/9.1.27.
- [52] Z. R. Li, H. H. Lin, L. Y. Han, L. Jiang, X. Chen, and Y. Z. Chen, “PROFEAT: A web server for computing structural and physicochemical features of proteins and peptides from amino acid sequence,” *Nucleic Acids Research*, vol. 34, no. WEB. SERV. ISS., Jul. 2006, doi: 10.1093/nar/gkl305.
- [53] L. R. Murphy, A. Wallqvist, and R. M. Levy, “Simplified amino acid alphabets for protein fold recognition and implications for folding,” *Protein Eng*, vol. 13, no. 3, pp. 149–152, Mar. 2000, doi: 10.1093/protein/13.3.149.
- [54] I. Dubchak, I. Muchnik, S. R. Holbrook, and S. H. Kim, “Prediction of protein folding class using global description of amino acid sequence.,” *Proc Natl Acad Sci U S A*, vol. 92, no. 19, pp. 8700–8704, Sep. 1995.
- [55] D. Eisenberg, R. M. Weiss, and T. C. Terwilliger, “The hydrophobic moment detects periodicity in protein hydrophobicity.,” *Proc Natl Acad Sci U S A*, vol. 81, no. 1, pp. 140–144, Jan. 1984.
- [56] P. Klein, M. Kanehisa, and C. DeLisi, “Prediction of protein function from sequence properties. Discriminant analysis of a data base,” *Biochim Biophys Acta*, vol. 787, no. 3, pp. 221–226, Jun. 1984, doi: 10.1016/0167-4838(84)90312-1.
- [57] M. Charton and B. I. Charton, “The dependence of the Chou-Fasman parameters on amino acid side chain structure,” *J Theor Biol*, vol. 102, no. 1, pp. 121–134, May 1983, doi: 10.1016/0022-5193(83)90265-5.
- [58] L. A. Kuhn, C. A. Swanson, M. E. Pique, J. A. Tainer, and E. D. Getzoff, “Atomic and residue hydrophilicity in the context of folded protein structures,” *Proteins*, vol. 23, no. 4, pp. 536–547, Dec. 1995, doi: 10.1002/prot.340230408.
- [59] H. Cid, M. Bunster, M. Canales, and F. Gazitúa, “Hydrophobicity and structural classes in proteins,” *Protein Eng*, vol. 5, no. 5, pp. 373–375, Jul. 1992, doi: 10.1093/protein/5.5.373.
- [60] P. Manavalan and P. K. Ponnuswamy, “Hydrophobic character of amino acid residues in globular proteins,” *Nature*, vol. 275, no. 5681, pp. 673–674, Oct. 1978, doi: 10.1038/275673a0.
- [61] P. K. Ponnuswamy, M. Prabhakaran, and P. Manavalan, “Hydrophobic packing and spatial arrangement of amino acid residues in globular proteins,” *Biochim Biophys Acta*, vol. 623, no. 2, pp. 301–316, Jun. 1980, doi: 10.1016/0005-2795(80)90258-5.
- [62] M. Prabhakaran, “The distribution of physical, chemical and conformational properties in signal and nascent peptides,” *Biochem J*, vol. 269, no. 3, pp. 691–696, Aug. 1990, doi: 10.1042/bj2690691.
- [63] R. M. Sweet and D. Eisenberg, “Correlation of sequence hydrophobicities measures similarity in three-dimensional protein structure,” *J Mol Biol*, vol. 171, no. 4, pp. 479–488, Dec. 1983, doi: 10.1016/0022-2836(83)90041-4.

- [64] J. M. Zimmerman, N. Eliezer, and R. Simha, "The characterization of amino acid sequences in proteins by statistical methods," *J Theor Biol*, vol. 21, no. 2, pp. 170–201, Nov. 1968, doi: 10.1016/0022-5193(68)90069-6.
- [65] R. V. Wolfenden, P. M. Cullis, and C. C. Southgate, "Water, protein folding, and the genetic code," *Science*, vol. 206, no. 4418, pp. 575–577, Nov. 1979, doi: 10.1126/science.493962.
- [66] G. Casari and M. J. Sippl, "Structure-derived hydrophobic potential. Hydrophobic potential derived from X-ray structures of globular proteins is able to identify native folds," *J Mol Biol*, vol. 224, no. 3, pp. 725–732, Apr. 1992, doi: 10.1016/0022-2836(92)90556-y.
